# Supplementary material for: Molecular identification and safety assessment of the potential probiotic strain Bacillus paralicheniformis HMPM220325 isolated from artisanal fruit dairy products
Source: Royal Society of Chemistry journal article supplement (doi:10.1039/d3fo04625g), 2023-12-11
Supplement: d3fo04625g1.pdf [file d3fo04625g1.pdf]

| Location   | Island ID | Sample | NanGene ID | Gene Start | Gene End | Strand | NR Descrip |
|------------|-----------|--------|------------|------------|----------|--------|------------|
| Chromosome | GI01      | BP     | gene1358   | 1363813    | 1364253  | +      | YxxD       |
| Chromosome | GI01      | BP     | gene1359   | 1365291    | 1364341  | -      | glycoside  |
| Chromosome | GI01      | BP     | gene1360   | 1366130    | 1366243  | +      | hypothetic |
| Chromosome | GI01      | BP     | gene1361   | 1366654    | 1366322  | -      | MULTISPECI |
| Chromosome | GI01      | BP     | gene1362   | 1368108    | 1366666  | -      | MULTISPECI |
| Chromosome | GI01      | BP     | gene1363   | 1368162    | 1368500  | +      | MULTISPECI |
| Chromosome | GI01      | BP     | gene1364   | 1368778    | 1368578  | -      | hypothetic |
| Chromosome | GI01      | BP     | gene1365   | 1368830    | 1369018  | +      | hypothetic |
| Chromosome | GI01      | BP     | gene1366   | 1369074    | 1369367  | +      | RecName: F |
| Chromosome | GI01      | BP     | gene1367   | 1369383    | 1369646  | +      | MULTISPECI |
| Chromosome | GI01      | BP     | gene1368   | 1369698    | 1370777  | +      | MULTISPECI |
| Chromosome | GI01      | BP     | gene1369   | 1371000    | 1370812  | -      | MULTISPECI |
| Chromosome | GI01      | BP     | gene1370   | 1371834    | 1371019  | -      | MULTISPECI |
| Chromosome | GI01      | BP     | gene1372   | 1372567    | 1372746  | +      | MULTISPECI |
| Chromosome | GI02      | BP     | gene1963   | 1923922    | 1924386  | +      | MULTISPECI |
| Chromosome | GI02      | BP     | gene1964   | 1925026    | 1924637  | -      | MULTISPECI |
| Chromosome | GI02      | BP     | gene1965   | 1925528    | 1926664  | +      | MULTISPECI |
| Chromosome | GI02      | BP     | gene1966   | 1926654    | 1926791  | +      | MULTISPECI |
| Chromosome | GI02      | BP     | gene1967   | 1926994    | 1928793  | +      | GHH signat |
| Chromosome | GI02      | BP     | gene1968   | 1928814    | 1929146  | +      | hypothetic |
| Chromosome | GI02      | BP     | gene1969   | 1929582    | 1930028  | +      | sigma-70,  |
| Chromosome | GI02      | BP     | gene1970   | 1930248    | 1931162  | +      | hypothetic |
| Chromosome | GI02      | BP     | gene1971   | 1931232    | 1931402  | +      | ATPase su  |
| Chromosome | GI02      | BP     | gene1972   | 1931918    | 1932154  | +      | phage tern |
| Chromosome | GI02      | BP     | gene1973   | 1932717    | 1933214  | +      | phage tern |
| Chromosome | GI02      | BP     | gene1974   | 1933218    | 1934756  | +      | phage port |
| Chromosome | GI02      | BP     | gene1975   | 1934749    | 1935666  | +      | hypothetic |
| Chromosome | GI02      | BP     | gene1976   | 1935716    | 1936588  | +      | hypothetic |
| Chromosome | GI02      | BP     | gene1977   | 1936594    | 1937772  | +      | XkdF-like  |
| Chromosome | GI02      | BP     | gene1978   | 1937785    | 1938720  | +      | phage majc |
| Chromosome | GI02      | BP     | gene1979   | 1938731    | 1939051  | +      | phage-like |
| Chromosome | GI02      | BP     | gene1980   | 1940254    | 1940060  | -      | hypothetic |
| Chromosome | GI02      | BP     | gene1981   | 1940388    | 1940531  | +      | LXG domair |
| Chromosome | GI02      | BP     | gene1982   | 1940494    | 1940727  | +      | LXG domair |
| Chromosome | GI02      | BP     | gene1983   | 1941127    | 1942017  | +      | hypothetic |
| Chromosome | GI02      | BP     | gene1984   | 1942020    | 1942484  | +      | SMI1/KNR4  |
| Chromosome | GI02      | BP     | gene1985   | 1942799    | 1943191  | +      | hypothetic |
| Chromosome | GI02      | BP     | gene1986   | 1944498    | 1943512  | -      | hypothetic |
| Chromosome | GI02      | BP     | gene1987   | 1944907    | 1944515  | -      | (2Fe-2S) f |
| Chromosome | GI02      | BP     | gene1988   | 1945493    | 1945906  | +      | MULTISPECI |
| Chromosome | GI02      | BP     | gene1989   | 1946199    | 1946089  | -      | MULTISPECI |
| Chromosome | GI03      | BP     | gene2309   | 2294222    | 2294049  | -      | hypothetic |
| Chromosome | GI03      | BP     | gene2310   | 2295236    | 2294580  | -      | MULTISPECI |
| Chromosome | GI03      | BP     | gene2311   | 2296897    | 2295233  | -      | MULTISPECI |
| Chromosome | GI03      | BP     | gene2312   | 2298576    | 2297425  | -      | MULTISPECI |
| Chromosome | GI03      | BP     | gene2313   | 2300100    | 2299435  | -      | MULTISPECI |
| Chromosome | GI03      | BP     | gene2314   | 2300925    | 2300461  | -      | MULTISPECI |
| Chromosome | GI03      | BP     | gene2315   | 2301309    | 2301031  | -      | MULTISPECI |
| Chromosome | GI03      | BP     | gene2316   | 2301702    | 2301313  | -      | MULTISPECI |
| Chromosome | GI03      | BP     | gene2317   | 2302037    | 2302315  | +      | MULTISPECI |

|                |    |          |         |           |            |
|----------------|----|----------|---------|-----------|------------|
| ChromosomeGI03 | BP | gene2318 | 2302725 | 2303012 + | MULTISPECI |
| ChromosomeGI03 | BP | gene2319 | 2303533 | 2303787 + | MULTISPECI |
| ChromosomeGI03 | BP | gene2320 | 2304603 | 2305040 + | MULTISPECI |
| ChromosomeGI03 | BP | gene2321 | 2305137 | 2305988 + | MULTISPECI |
| ChromosomeGI03 | BP | gene2322 | 2306151 | 2306795 + | MULTISPECI |
| ChromosomeGI04 | BP | gene2334 | 2317474 | 2317599 + | MULTISPECI |
| ChromosomeGI04 | BP | gene2335 | 2317621 | 2318076 + | MULTISPECI |
| ChromosomeGI04 | BP | gene2336 | 2318200 | 2318715 + | MULTISPECI |
| ChromosomeGI04 | BP | gene2337 | 2319384 | 2318758 - | MULTISPECI |
| ChromosomeGI04 | BP | gene2338 | 2321148 | 2319685 - | MULTISPECI |
| ChromosomeGI04 | BP | gene2339 | 2321287 | 2321601 + | hypothetic |
| ChromosomeGI04 | BP | gene2340 | 2322574 | 2322978 + | MULTISPECI |
| ChromosomeGI04 | BP | gene2341 | 2323270 | 2322866 - | aminotrans |
| ChromosomeGI04 | BP | gene2342 | 2323788 | 2323300 - | MULTISPECI |
| ChromosomeGI04 | BP | gene2343 | 2324245 | 2323901 - | MULTISPECI |
| ChromosomeGI04 | BP | gene2344 | 2324891 | 2324682 - | MULTISPECI |
| ChromosomeGI05 | BP | gene2765 | 2742958 | 2741846 - | glycosyltr |
| ChromosomeGI05 | BP | gene2766 | 2743452 | 2742955 - | hypothetic |
| ChromosomeGI05 | BP | gene2767 | 2743613 | 2743978 + | YqzD       |
| ChromosomeGI05 | BP | gene2768 | 2743975 | 2744454 + | MULTISPECI |
| ChromosomeGI05 | BP | gene2769 | 2745110 | 2745018 - | hypothetic |
| ChromosomeGI05 | BP | gene2770 | 2745572 | 2745276 - | MULTISPECI |
| ChromosomeGI05 | BP | gene2771 | 2746116 | 2745562 - | MULTISPECI |
| ChromosomeGI05 | BP | gene2772 | 2746820 | 2746113 - | MULTISPECI |
| ChromosomeGI05 | BP | gene2773 | 2748511 | 2746817 - | MULTISPECI |
| ChromosomeGI05 | BP | gene2774 | 2748930 | 2748586 - | MULTISPECI |
| ChromosomeGI05 | BP | gene2775 | 2749608 | 2748955 - | MULTISPECI |
| ChromosomeGI05 | BP | gene2776 | 2750986 | 2750207 - | MULTISPECI |
| ChromosomeGI05 | BP | gene2777 | 2751826 | 2750999 - | phosphate  |

tion

hydrolase family 43 protein  
al protein  
ES: hypothetical protein  
ES: hypothetical protein  
ES: DUF1433 domain-containing protein  
al protein  
al protein  
Full=Uncharacterized 11.0 kDa protein in cwll 5' region  
ES: phage holin  
ES: N-acetylmuramoyl-L-alanine amidase  
ES: hypothetical protein  
ES: GAF domain-containing protein  
ES: hypothetical protein  
ES: SMI1/KNR4 family protein  
ES: hypothetical protein  
ES: tetratricopeptide repeat protein  
ES: hypothetical protein  
ure containing HNH/Endo VII supernuclease toxin family protein  
al protein  
region 4 family protein  
al protein  
unit of terminase family protein  
inase large subunit  
inase large subunit  
al protein  
al protein  
al protein  
putative serine protease domain-containing protein  
or capsid protein  
element PBSX protein xkdM  
al protein  
n of WXG superfamily protein  
n of WXG superfamily protein  
al protein  
family protein  
al protein  
al protein  
ferredoxin domain-containing protein  
ES: YjdF family protein  
ES: YjcZ family sporulation protein  
al protein  
ES: SMI1/KNR4 family protein  
ES: transposase  
ES: serine hydrolase  
ES: PilZ domain-containing protein  
ES: SMI1/KNR4 family protein  
ES: YwqI/YxiC family protein  
ES: DUF5082 family protein  
ES: hypothetical protein

ES: YozQ family protein  
ES: YciI family protein  
ES: hypothetical protein  
ES: SMI1/KNR4 family protein  
ES: DUF1796 family putative cysteine peptidase  
ES: hypothetical protein  
ES: YndM family protein  
ES: DinB family protein  
ES: FMN-dependent NADH-azoreductase  
ES: serine hydrolase  
al protein  
ES: integrase  
ferase class I and II family protein  
ES: TraR/DksA C4-type zinc finger protein  
ES: PH domain-containing protein  
ES: DUF6501 family protein  
ransferase family 4 protein  
al protein

ES: endolytic transglycosylase MltG  
al protein  
ES: hypothetical protein  
ES: stage II sporulation protein M  
ES: ABC transporter ATP-binding protein  
ES: hypothetical protein  
ES: uberolysin/carnocyclin family circular bacteriocin  
ES: YIP1 family protein  
ES: phosphate ABC transporter ATP-binding protein PstB  
ABC transporter ATP-binding protein
