# Supplementary material for: Molecular identification and safety assessment of the potential probiotic strain Bacillus paralicheniformis HMPM220325 isolated from artisanal fruit dairy products
Source: Royal Society of Chemistry journal article supplement (doi:10.1039/d3fo04625g), 2023-12-11
Supplement: d3fo04625g2.pdf [file d3fo04625g2.pdf]

| Gene ID  | Location     | Sample | NanARO Name | ARO Access | ARO Descri           | Drug Class | Resistance |
|----------|--------------|--------|-------------|------------|----------------------|------------|------------|
| gene0005 | ChromosomeBP |        | Streptomyc  | ARO:300331 | point mutε           | aminocoumε | antibiotic |
| gene0093 | ChromosomeBP |        | sul4        | ARO:300436 | sul4 is a sulfonam   | ic         | antibiotic |
| gene0142 | ChromosomeBP |        | tetT        | ARO:300019 | Tet (T) is tetracycl |            | antibiotic |
| gene0175 | ChromosomeBP |        | patA        | ARO:300002 | PatA is arfluoroquir |            | antibiotic |
| gene0202 | ChromosomeBP |        | Escherichi  | ARO:300461 | An ampC-lice         | phalosp    | antibiotic |
| gene0221 | ChromosomeBP |        | bcrA        | ARO:300298 | bcrA is ar           | peptide    | antibiotic |
| gene0230 | ChromosomeBP |        | bcrA        | ARO:300298 | bcrA is ar           | peptide    | antibiotic |
| gene0233 | ChromosomeBP |        | vanRM       | ARO:300292 | vanRM is ε           | glycopepti | antibiotic |
| gene0235 | ChromosomeBP |        | msbA        | ARO:300398 | MsbA is a nitroimidε |            | antibiotic |
| gene0240 | ChromosomeBP |        | aadK        | ARO:300262 | aadK is a aminoglycc |            | antibiotic |
| gene0281 | ChromosomeBP |        | vgbC        | ARO:300399 | VgbC is a streptogrε |            | antibiotic |
| gene0297 | ChromosomeBP |        | blaR1       | ARO:300021 | blaR1 is ε           | penam      | antibiotic |
| gene0298 | ChromosomeBP |        | mecI        | ARO:300012 | mecI acts carbapenen |            | antibiotic |
| gene0299 | ChromosomeBP |        | BCL-1       | ARO:300474 | BCL-1 is ε           | penam      | antibiotic |
| gene0312 | ChromosomeBP |        | vanRI       | ARO:300372 | VanRI is t           | glycopepti | antibiotic |
| gene0314 | ChromosomeBP |        | bcrA        | ARO:300298 | bcrA is ar           | peptide    | antibiotic |
| gene0319 | ChromosomeBP |        | mphK        | ARO:300454 | A chromosc           | macrolide  | antibiotic |
| gene0332 | ChromosomeBP |        | bcrA        | ARO:300298 | bcrA is ar           | peptide    | antibiotic |
| gene0335 | ChromosomeBP |        | vanRM       | ARO:300292 | vanRM is ε           | glycopepti | antibiotic |
| gene0369 | ChromosomeBP |        | bcrA        | ARO:300298 | bcrA is ar           | peptide    | antibiotic |
| gene0432 | ChromosomeBP |        | macB        | ARO:300005 | MacB is ar           | macrolide  | antibiotic |
| gene0473 | ChromosomeBP |        | tetA (46)   | ARO:300403 | tetA (46) it         | tetracycl  | antibiotic |
| gene0475 | ChromosomeBP |        | vanRM       | ARO:300292 | vanRM is ε           | glycopepti | antibiotic |
| gene0481 | ChromosomeBP |        | tlrC        | ARO:300282 | tlrC is ar           | lincosami  | antibiotic |
| gene0483 | ChromosomeBP |        | Staphylocc  | ARO:300457 | MFS trans            | aminoglycc | antibiotic |
| gene0545 | ChromosomeBP |        | gimA        | ARO:300046 | A macrolic           | macrolide  | antibiotic |
| gene0553 | ChromosomeBP |        | bcrA        | ARO:300298 | bcrA is ar           | peptide    | antibiotic |
| gene0561 | ChromosomeBP |        | vanG        | ARO:300290 | VanG is a glycopepti |            | antibiotic |
| gene0652 | ChromosomeBP |        | optrA       | ARO:300374 | OptrA is ε           | lincosami  | antibiotic |
| gene0670 | ChromosomeBP |        | rphB        | ARO:300399 | rphB is a rifamycin  |            | antibiotic |
| gene0771 | ChromosomeBP |        | cmeB        | ARO:300078 | CmeB is th           | cephalosp  | antibiotic |
| gene0803 | ChromosomeBP |        | TaeA        | ARO:300398 | Pleuromu             | ti         | antibiotic |
| gene0819 | ChromosomeBP |        | optrA       | ARO:300374 | OptrA is ε           | lincosami  | antibiotic |
| gene0825 | ChromosomeBP |        | macB        | ARO:300005 | MacB is ar           | macrolide  | antibiotic |
| gene0887 | ChromosomeBP |        | oleD        | ARO:300008 | OleD is a macrolide  |            | antibiotic |
| gene0919 | ChromosomeBP |        | Bacillus s  | ARO:300332 | MprF is a peptide    |            | antibiotic |
| gene0941 | ChromosomeBP |        | novA        | ARO:300252 | A type III           | aminocoumε | antibiotic |
| gene0943 | ChromosomeBP |        | macB        | ARO:300005 | MacB is ar           | macrolide  | antibiotic |
| gene0984 | ChromosomeBP |        | macB        | ARO:300005 | MacB is ar           | macrolide  | antibiotic |
| gene0991 | ChromosomeBP |        | oleC        | ARO:300374 | oleC is ar           | macrolide  | antibiotic |
| gene1008 | ChromosomeBP |        | lmrB        | ARO:300281 | lmrB is a lincosami  |            | antibiotic |
| gene1013 | ChromosomeBP |        | oleC        | ARO:300374 | oleC is ar           | macrolide  | antibiotic |
| gene1014 | ChromosomeBP |        | bcrA        | ARO:300298 | bcrA is ar           | peptide    | antibiotic |
| gene1037 | ChromosomeBP |        | vmlR        | ARO:300447 | vmlR is ar           | lincosami  | antibiotic |
| gene1102 | ChromosomeBP |        | tetA (60)   | ARO:300403 | tetA (60) it         | tetracycl  | antibiotic |
| gene1103 | ChromosomeBP |        | tetB (60)   | ARO:300403 | tetB (60) it         | tetracycl  | antibiotic |
| gene1125 | ChromosomeBP |        | bcrA        | ARO:300298 | bcrA is ar           | peptide    | antibiotic |
| gene1208 | ChromosomeBP |        | vanRI       | ARO:300372 | VanRI is t           | glycopepti | antibiotic |
| gene1274 | ChromosomeBP |        | bacA        | ARO:300298 | The bacA ε           | peptide    | antibiotic |
| gene1286 | ChromosomeBP |        | macB        | ARO:300005 | MacB is ar           | macrolide  | antibiotic |

|          |              |            |                                           |
|----------|--------------|------------|-------------------------------------------|
| gene1298 | ChromosomeBP | efrA       | ARO:300394efrA is a fluoroquirantibiotic  |
| gene1383 | ChromosomeBP | lmrB       | ARO:300281lmrB is a lincosamicantibiotic  |
| gene1466 | ChromosomeBP | tetA (58)  | ARO:300398TetA (58) itetracycliantibiotic |
| gene1481 | ChromosomeBP | ykkC       | ARO:300306ykkC is araminoglyccantibiotic  |
| gene1482 | ChromosomeBP | ykkD       | ARO:300306ykkD is araminoglyccantibiotic  |
| gene1588 | ChromosomeBP | mecA       | ARO:300061A foreign carbapenenantibiotic  |
| gene1603 | ChromosomeBP | FosB       | ARO:300017A thiol trfosfomyrirantibiotic  |
| gene1684 | ChromosomeBP | tetA (60)  | ARO:300405tetA (60) itetracycliantibiotic |
| gene1685 | ChromosomeBP | tetB (60)  | ARO:300405tetB (60) itetracycliantibiotic |
| gene1688 | ChromosomeBP | macB       | ARO:300055MacB is armacrolide antibiotic  |
| gene1689 | ChromosomeBP | macB       | ARO:300055MacB is armacrolide antibiotic  |
| gene1697 | ChromosomeBP | optrA      | ARO:300374Optra is elincosamicantibiotic  |
| gene1732 | ChromosomeBP | iri        | ARO:300288iri is a nrifamycin antibiotic  |
| gene1771 | ChromosomeBP | mecA       | ARO:300061A foreign carbapenenantibiotic  |
| gene1789 | ChromosomeBP | tetA (58)  | ARO:300398TetA (58) itetracycliantibiotic |
| gene1790 | ChromosomeBP | RlmA (II)  | ARO:30013(RlmA (II) ilincosamicantibiotic |
| gene1798 | ChromosomeBP | Staphylocc | ARO:300055An alternemupirocin antibiotic  |
| gene1831 | ChromosomeBP | clbC       | ARO:300281clbC is a lincosamicantibiotic  |
| gene1993 | ChromosomeBP | tet (L)    | ARO:300017TetL is a tetracycliantibiotic  |
| gene1998 | ChromosomeBP | gimA       | ARO:300046A macrolicmacrolide antibiotic  |
| gene2009 | ChromosomeBP | Escherichi | ARO:300405Member of macrolide antibiotic  |
| gene2010 | ChromosomeBP | abeS       | ARO:300076AbeS in araminocoumeantibiotic  |
| gene2088 | ChromosomeBP | ykkD       | ARO:300306ykkD is araminoglyccantibiotic  |
| gene2089 | ChromosomeBP | qacH       | ARO:300383qacH is a fluoroquirantibiotic  |
| gene2133 | ChromosomeBP | Streptomyc | ARO:300331point mutεaminocoumeantibiotic  |
| gene2188 | ChromosomeBP | bcrA       | ARO:300298bcrA is arpeptide arantibiotic  |
| gene2211 | ChromosomeBP | bcrA       | ARO:300298bcrA is arpeptide arantibiotic  |
| gene2254 | ChromosomeBP | efrA       | ARO:300394efrA is a fluoroquirantibiotic  |
| gene2255 | ChromosomeBP | patB       | ARO:300002PatB is arfluoroquirantibiotic  |
| gene2259 | ChromosomeBP | lmrB       | ARO:300281lmrB is a lincosamicantibiotic  |
| gene2262 | ChromosomeBP | otr (B)    | ARO:300289otr (B) is tetracycliantibiotic |
| gene2268 | ChromosomeBP | vmlR       | ARO:300447vmlR is arlincosamicantibiotic  |
| gene2332 | ChromosomeBP | rphB       | ARO:300399rphB is a rifamycin antibiotic  |
| gene2360 | ChromosomeBP | PmpM       | ARO:300407PmpM is a aminoglyccantibiotic  |
| gene2414 | ChromosomeBP | dfrG       | ARO:300286dfrG is a diaminopyrantibiotic  |
| gene2550 | ChromosomeBP | mtrA       | ARO:300081Mtra is a macrolide antibiotic  |
| gene2552 | ChromosomeBP | arlR       | ARO:300083ArlR is a acridine cantibiotic  |
| gene2621 | ChromosomeBP | msbA       | ARO:300395MsbA is a nitroimidεantibiotic  |
| gene2622 | ChromosomeBP | macB       | ARO:300055MacB is armacrolide antibiotic  |
| gene2633 | ChromosomeBP | lsaC       | ARO:300311LsaC is arlincosamicantibiotic  |
| gene2635 | ChromosomeBP | bcrC       | ARO:300325The bcrC εpeptide arantibiotic  |
| gene2636 | ChromosomeBP | bcrB       | ARO:300298bcrB is arpeptide arantibiotic  |
| gene2637 | ChromosomeBP | bcrA       | ARO:300298bcrA is arpeptide arantibiotic  |
| gene2638 | ChromosomeBP | vanSF      | ARO:300295vanSF is εglycopeptiantibiotic  |
| gene2639 | ChromosomeBP | vanRF      | ARO:300292vanRF is εglycopeptiantibiotic  |
| gene2673 | ChromosomeBP | macB       | ARO:300055MacB is armacrolide antibiotic  |
| gene2772 | ChromosomeBP | bcrA       | ARO:300298bcrA is arpeptide arantibiotic  |
| gene2776 | ChromosomeBP | lmrD       | ARO:300288lmrD is a lincosamicantibiotic  |
| gene2777 | ChromosomeBP | patB       | ARO:300002PatB is arfluoroquirantibiotic  |
| gene2792 | ChromosomeBP | bcrA       | ARO:300298bcrA is arpeptide arantibiotic  |
| gene2878 | ChromosomeBP | vanRA      | ARO:300291vanRA, als glycopeptiantibiotic |

|          |              |            |                                           |
|----------|--------------|------------|-------------------------------------------|
| gene2915 | ChromosomeBP | ErmD       | ARO:300049ErmD confelincosamicantibiotic  |
| gene2929 | ChromosomeBP | msbA       | ARO:300399MsbA is a nitroimidæantibiotic  |
| gene2930 | ChromosomeBP | patA       | ARO:300002PatA is arfluoroquirantibiotic  |
| gene2932 | ChromosomeBP | cdeA       | ARO:300389Clostridiacridine cantibiotic   |
| gene2952 | ChromosomeBP | catV       | ARO:300439A chlorammpenicol æantibiotic   |
| gene2961 | ChromosomeBP | cmlv       | ARO:300270cmlv is a phenicol æantibiotic  |
| gene3031 | ChromosomeBP | vanRF      | ARO:300292vanRF is æglycopeptiantibiotic  |
| gene3171 | ChromosomeBP | mtrA       | ARO:300081MtrA is a macrolide antibiotic  |
| gene3257 | ChromosomeBP | bcrA       | ARO:300298bcrA is arpeptide arantibiotic  |
| gene3287 | ChromosomeBP | macB       | ARO:300005MacB is armacrolide antibiotic  |
| gene3289 | ChromosomeBP | bcrA       | ARO:300298bcrA is arpeptide arantibiotic  |
| gene3309 | ChromosomeBP | macB       | ARO:300005MacB is armacrolide antibiotic  |
| gene3383 | ChromosomeBP | vanTE      | ARO:300297vanTE is æglycopeptiantibiotic  |
| gene3401 | ChromosomeBP | bacA       | ARO:300298The bacA æpeptide arantibiotic  |
| gene3518 | ChromosomeBP | vanHB      | ARO:300294vanHB is æglycopeptiantibiotic  |
| gene3537 | ChromosomeBP | macB       | ARO:300005MacB is armacrolide antibiotic  |
| gene3545 | ChromosomeBP | blt        | ARO:300300blt is an acridine cantibiotic  |
| gene3559 | ChromosomeBP | lmrD       | ARO:300288lmrD is a lincosamicantibiotic  |
| gene3590 | ChromosomeBP | vanRM      | ARO:300292vanRM is æglycopeptiantibiotic  |
| gene3628 | ChromosomeBP | vanRF      | ARO:300292vanRF is æglycopeptiantibiotic  |
| gene3629 | ChromosomeBP | msbA       | ARO:300399MsbA is a nitroimidæantibiotic  |
| gene3635 | ChromosomeBP | Staphylocc | ARO:300457MFS transæaminoglyccantibiotic  |
| gene3655 | ChromosomeBP | oleC       | ARO:300374oleC is armacrolide antibiotic  |
| gene3730 | ChromosomeBP | bcrA       | ARO:300298bcrA is arpeptide arantibiotic  |
| gene3758 | ChromosomeBP | vanHB      | ARO:300294vanHB is æglycopeptiantibiotic  |
| gene3824 | ChromosomeBP | macB       | ARO:300005MacB is armacrolide antibiotic  |
| gene3849 | ChromosomeBP | vanRM      | ARO:300292vanRM is æglycopeptiantibiotic  |
| gene3943 | ChromosomeBP | blt        | ARO:300300blt is an acridine cantibiotic  |
| gene3985 | ChromosomeBP | Chlamydia  | ARO:300378Chlamydia fosfomycirantibiotic  |
| gene4021 | ChromosomeBP | Chlamydia  | ARO:300378Chlamydia fosfomycirantibiotic  |
| gene4024 | ChromosomeBP | evgS       | ARO:300008EvgS is a fluoroquirantibiotic  |
| gene4065 | ChromosomeBP | tetA (58)  | ARO:300399TetA (58) itetracycliantibiotic |
| gene4136 | ChromosomeBP | emrY       | ARO:300002emrY is a tetracycliantibiotic  |
| gene4159 | ChromosomeBP | novA       | ARO:300252A type IIlaminocoumæantibiotic  |
| gene4165 | ChromosomeBP | bcrA       | ARO:300298bcrA is arpeptide arantibiotic  |
| gene4178 | ChromosomeBP | novA       | ARO:300252A type IIlaminocoumæantibiotic  |
| gene4179 | ChromosomeBP | msbA       | ARO:300399MsbA is a nitroimidæantibiotic  |
| gene4190 | ChromosomeBP | vanRM      | ARO:300292vanRM is æglycopeptiantibiotic  |
| gene4191 | ChromosomeBP | vanSE      | ARO:300293vanSE is æglycopeptiantibiotic  |
| gene4192 | ChromosomeBP | bcrA       | ARO:300298bcrA is arpeptide arantibiotic  |
| gene4261 | ChromosomeBP | macB       | ARO:300005MacB is armacrolide antibiotic  |
| gene4263 | ChromosomeBP | smeR       | ARO:300300smeR is tæaminoglyccantibiotic  |
| gene4301 | ChromosomeBP | optrA      | ARO:300374OptrA is ælincosamicantibiotic  |
| gene4313 | ChromosomeBP | novA       | ARO:300252A type IIlaminocoumæantibiotic  |
| gene4315 | ChromosomeBP | vanRM      | ARO:300292vanRM is æglycopeptiantibiotic  |
| gene4349 | ChromosomeBP | tetA (58)  | ARO:300399TetA (58) itetracycliantibiotic |
| gene4367 | ChromosomeBP | vanRI      | ARO:300372VanRI is tglycopeptiantibiotic  |

| Identity (%) | Coverage (%) | Evalue          | Score |
|--------------|--------------|-----------------|-------|
| 42.9         | 97.8         | 4.90E-147       | 1325  |
| 50.2         | 91.2         | 9.10E-77        | 716   |
| 27.1         | 96.8         | 1.50E-72        | 683   |
| 30.6         | 80.8         | 3.20E-26        | 280   |
| 57.2         | 91.5         | 2.70E-139       | 1257  |
| 34.8         | 70.6         | 2.20E-33        | 342   |
| 50.5         | 86.8         | 5.10E-49        | 476   |
| 35           | 97.3         | 8.20E-33        | 336   |
| 29           | 98.4         | 1.70E-69        | 656   |
| 49.8         | 91           | 3.80E-78        | 728   |
| 59.2         | 99.3         | 7.90E-108       | 984   |
| 35.7         | 93.7         | 1.20E-99        | 916   |
| 42.9         | 93           | 2.60E-23        | 252   |
| 62.5         | 98.4         | 1.80E-102       | 938   |
| 37.2         | 97.4         | 1.10E-48        | 473   |
| 46.7         | 98.4         | 5.20E-78        | 727   |
| 60.4         | 99.3         | 3.50E-111       | 1013  |
| 50.9         | 87           | 3.70E-55        | 529   |
| 40           | 97.7         | 3.50E-36        | 365   |
| 32.3         | 94.6         | 1.60E-36        | 369   |
| 37.5         | 91.9         | 2.30E-31        | 324   |
| 25.2         | 97.4         | 2.60E-10        | 142   |
| 43.7         | 99.1         | 6.40E-49        | 475   |
| 27.8         | 70.8         | 1.50E-09        | 136   |
| 42.6         | 97.5         | 3.70E-99        | 911   |
| 29.1         | 99.5         | 5.40E-43        | 426   |
| 36.7         | 95.8         | 3.30E-48        | 470   |
| 36.8         | 95.8         | 6.00E-65        | 615   |
| 38           | 97.5         | 1.30E-115       | 1054  |
| 58.5         | 99.8         | 1.50E-292       | 2581  |
| 23.4         | 72.7         | 4.90E-43        | 430   |
| 49.8         | 100          | 1.20E-177       | 1589  |
| 33.9         | 94           | 1.10E-83        | 778   |
| 36.8         | 98.3         | 1.70E-25        | 272   |
| 27.2         | 92.4         | 4.70E-31        | 323   |
| 63.7         | 99.1         | 5.89999999E-115 | 2757  |
| 34           | 98.3         | 1.70E-93        | 863   |
| 27.8         | 75.5         | 5.70E-19        | 218   |
| 37.3         | 70.2         | 1.60E-27        | 291   |
| 24.9         | 83.9         | 1.30E-18        | 214   |
| 41.1         | 82           | 1.40E-91        | 846   |
| 28.7         | 91.8         | 2.10E-18        | 212   |
| 40           | 96.7         | 2.10E-55        | 532   |
| 38.6         | 70.7         | 1.40E-70        | 665   |
| 38.5         | 96.6         | 1.90E-116       | 1061  |
| 45.4         | 78.1         | 1.60E-127       | 1157  |
| 30.1         | 98.7         | 7.70E-34        | 346   |
| 38.3         | 96           | 8.90E-43        | 422   |
| 29.7         | 98.9         | 1.70E-27        | 291   |
| 31.1         | 73.1         | 3.90E-23        | 254   |

|      |      |           |      |
|------|------|-----------|------|
| 31.2 | 76.5 | 1.00E-17  | 207  |
| 44.1 | 97.5 | 1.50E-103 | 949  |
| 27.1 | 72.5 | 1.10E-17  | 207  |
| 71   | 98.2 | 4.20E-38  | 379  |
| 72.1 | 100  | 1.80E-38  | 382  |
| 36.6 | 95.6 | 5.00E-118 | 1075 |
| 55.6 | 87.7 | 2.60E-41  | 408  |
| 32   | 95   | 9.90E-78  | 727  |
| 36   | 93.9 | 1.40E-82  | 769  |
| 46.4 | 95.7 | 1.60E-55  | 532  |
| 37   | 98.5 | 5.70E-61  | 581  |
| 28.7 | 98   | 2.50E-67  | 637  |
| 40   | 98.4 | 9.00E-88  | 813  |
| 25.5 | 79.2 | 1.40E-27  | 295  |
| 28.8 | 79.2 | 6.80E-18  | 208  |
| 33.4 | 98.3 | 1.70E-41  | 412  |
| 29.1 | 88.5 | 5.20E-105 | 964  |
| 37.2 | 93.6 | 1.90E-50  | 490  |
| 42.6 | 99.8 | 1.30E-101 | 932  |
| 35.4 | 98.2 | 1.80E-59  | 568  |
| 40.2 | 85.7 | 4.90E-16  | 189  |
| 42   | 95.2 | 1.90E-19  | 218  |
| 32.7 | 90.9 | 7.80E-08  | 118  |
| 34.3 | 97.1 | 1.20E-13  | 168  |
| 41.6 | 95.4 | 5.10E-131 | 1187 |
| 36.7 | 71.6 | 1.10E-32  | 336  |
| 28.6 | 98.6 | 1.60E-33  | 343  |
| 44.7 | 99.1 | 9.00E-132 | 1193 |
| 36.9 | 94.9 | 1.30E-101 | 933  |
| 48.5 | 97.7 | 7.90E-126 | 1141 |
| 30.8 | 83   | 7.60E-58  | 555  |
| 42.9 | 96   | 6.70E-111 | 1013 |
| 42.3 | 99.5 | 3.80E-206 | 1836 |
| 36.2 | 97.6 | 1.70E-72  | 681  |
| 50.6 | 98.8 | 4.60E-49  | 475  |
| 39.7 | 96.6 | 9.50E-48  | 465  |
| 41   | 94.6 | 3.00E-49  | 478  |
| 29   | 78.5 | 2.40E-13  | 169  |
| 29.1 | 88.5 | 3.60E-19  | 219  |
| 28.9 | 86.8 | 5.90E-15  | 182  |
| 98   | 100  | 2.00E-110 | 1005 |
| 98.6 | 85.2 | 1.00E-105 | 965  |
| 99.3 | 100  | 4.40E-167 | 1495 |
| 29.3 | 89   | 1.40E-34  | 353  |
| 49.3 | 97.4 | 1.70E-60  | 575  |
| 38.7 | 90.5 | 6.00E-37  | 372  |
| 35.2 | 88.1 | 4.60E-34  | 347  |
| 29   | 86.9 | 6.00E-19  | 217  |
| 28   | 77.8 | 1.70E-19  | 222  |
| 31.9 | 81.6 | 9.40E-28  | 293  |
| 42.5 | 98.3 | 1.20E-50  | 490  |

|      |      |           |      |
|------|------|-----------|------|
| 97.2 | 100  | 3.00E-160 | 1436 |
| 29.4 | 78.7 | 1.40E-13  | 171  |
| 30.3 | 81.9 | 1.30E-17  | 206  |
| 30.3 | 93.6 | 3.80E-53  | 514  |
| 55.6 | 99.5 | 1.70E-75  | 704  |
| 36.8 | 92.4 | 5.50E-51  | 495  |
| 40.1 | 97.8 | 2.80E-41  | 409  |
| 45.3 | 98.3 | 1.00E-49  | 482  |
| 30.5 | 84.7 | 1.60E-23  | 256  |
| 44.3 | 95.3 | 2.50E-48  | 470  |
| 26.1 | 73.6 | 8.10E-20  | 225  |
| 30.7 | 81.1 | 6.80E-23  | 251  |
| 32   | 92.4 | 1.20E-42  | 423  |
| 46.7 | 97.8 | 9.50E-63  | 595  |
| 30.3 | 73.1 | 1.80E-25  | 274  |
| 38.8 | 99.5 | 1.00E-32  | 335  |
| 43.4 | 96.7 | 1.00E-89  | 829  |
| 27.6 | 86.2 | 6.30E-16  | 191  |
| 39.6 | 96.4 | 5.60E-37  | 372  |
| 40.7 | 95.5 | 3.10E-49  | 478  |
| 27.1 | 77.8 | 1.20E-17  | 206  |
| 43.2 | 95.2 | 2.90E-99  | 912  |
| 26.8 | 88.7 | 3.10E-20  | 228  |
| 33.9 | 97.1 | 2.20E-44  | 437  |
| 32.7 | 74.4 | 6.40E-31  | 321  |
| 34.7 | 96.9 | 6.10E-31  | 320  |
| 22   | 96.5 | 4.70E-07  | 114  |
| 21.8 | 94.2 | 1.00E-09  | 139  |
| 34.3 | 95   | 1.80E-60  | 577  |
| 34.5 | 96.3 | 1.90E-57  | 551  |
| 29.9 | 86.3 | 1.40E-10  | 142  |
| 34.2 | 99   | 7.00E-54  | 519  |
| 22.7 | 91.4 | 4.20E-15  | 186  |
| 33.2 | 98.9 | 1.10E-84  | 787  |
| 32.2 | 99.7 | 4.30E-37  | 374  |
| 28.9 | 95.7 | 3.70E-56  | 541  |
| 28   | 73.3 | 3.50E-43  | 429  |
| 34.6 | 88.6 | 2.30E-30  | 315  |
| 21.3 | 92.6 | 1.90E-06  | 110  |
| 28.1 | 78.6 | 1.50E-17  | 205  |
| 40.4 | 89.3 | 6.00E-48  | 467  |
| 32.1 | 96.5 | 7.90E-31  | 319  |
| 32   | 94.3 | 9.00E-75  | 701  |
| 27   | 78.3 | 7.20E-17  | 199  |
| 34.1 | 94.9 | 4.20E-35  | 356  |
| 31.6 | 97.3 | 1.10E-37  | 379  |
| 45.2 | 96.6 | 7.60E-53  | 509  |
