# Supplementary material for: Molecular identification and safety assessment of the potential probiotic strain Bacillus paralicheniformis HMPM220325 isolated from artisanal fruit dairy products
Source: Royal Society of Chemistry journal article supplement (doi:10.1039/d3fo04625g), 2023-12-11
Supplement: d3fo04625g3.pdf [file d3fo04625g3.pdf]

## Supplementary Materials

### Supplemental Figures and Tables

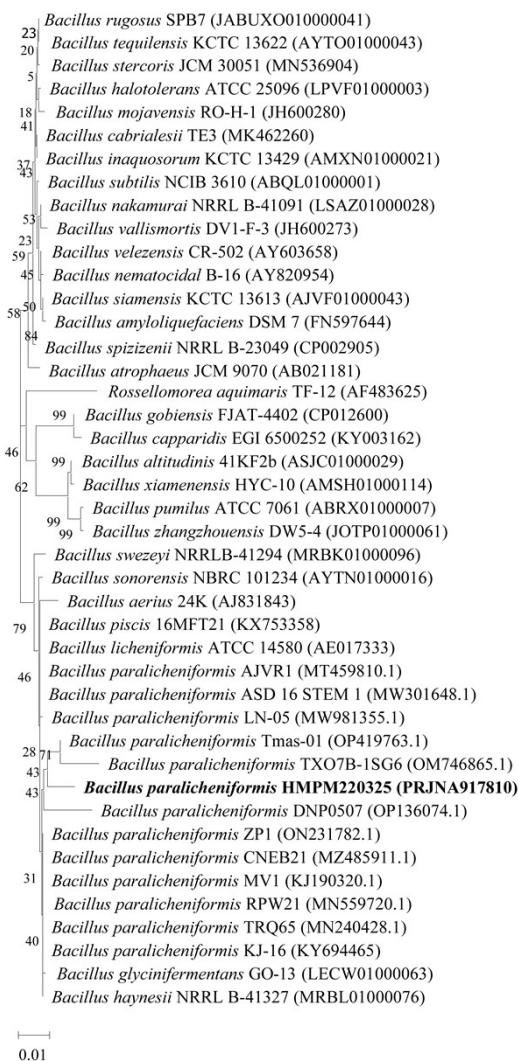

Supplementary Fig. 1 Phylogenetic analysis of *B. paralicheniformis* HMPM220325.

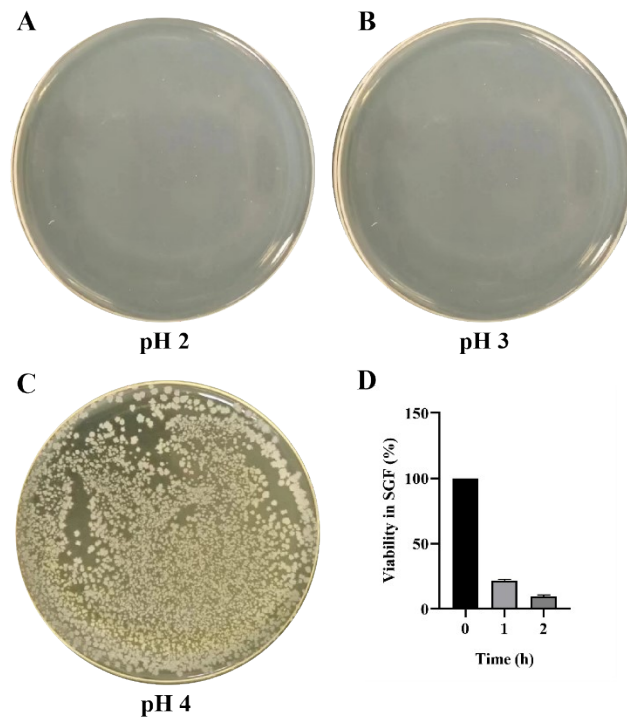

**Supplementary Fig. 2** (A-C) Acid tolerance assay of *B. paralicheniformis* HMPM220325. (D) Viability of *B. paralicheniformis* HMPM220325 in simulated gastric fluid (SGF).

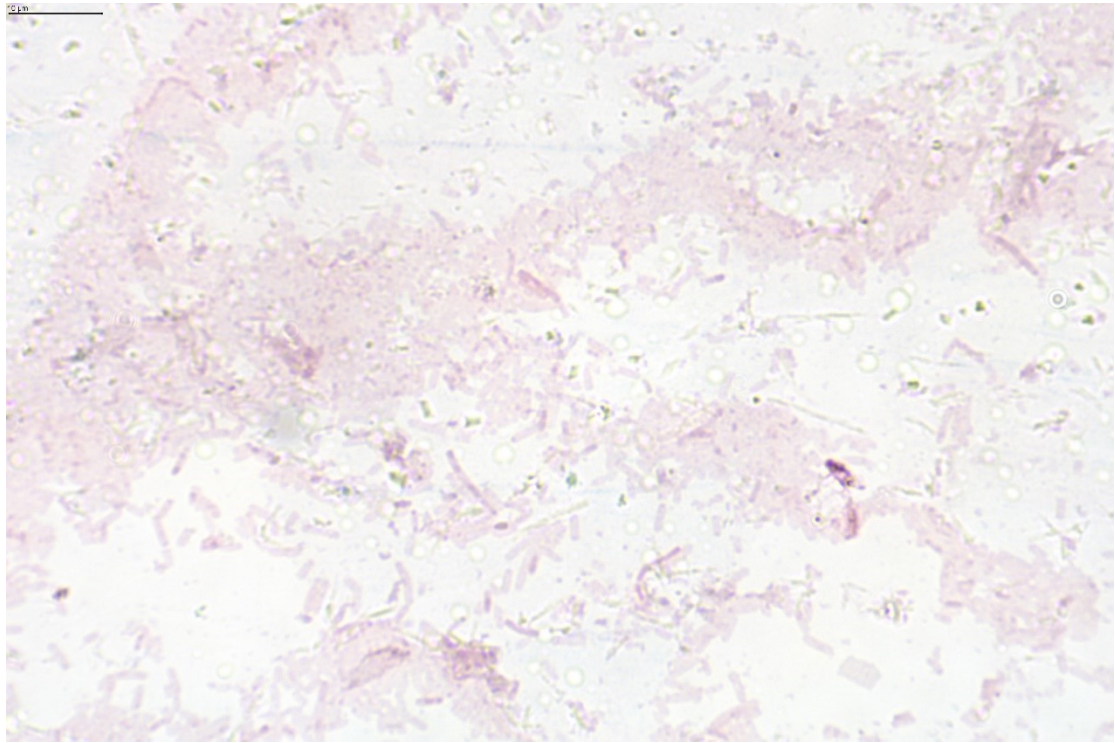

**Supplementary Fig. 3** Schaeffer-Fulton staining of *B. paralicheniformis* HMPM220325.

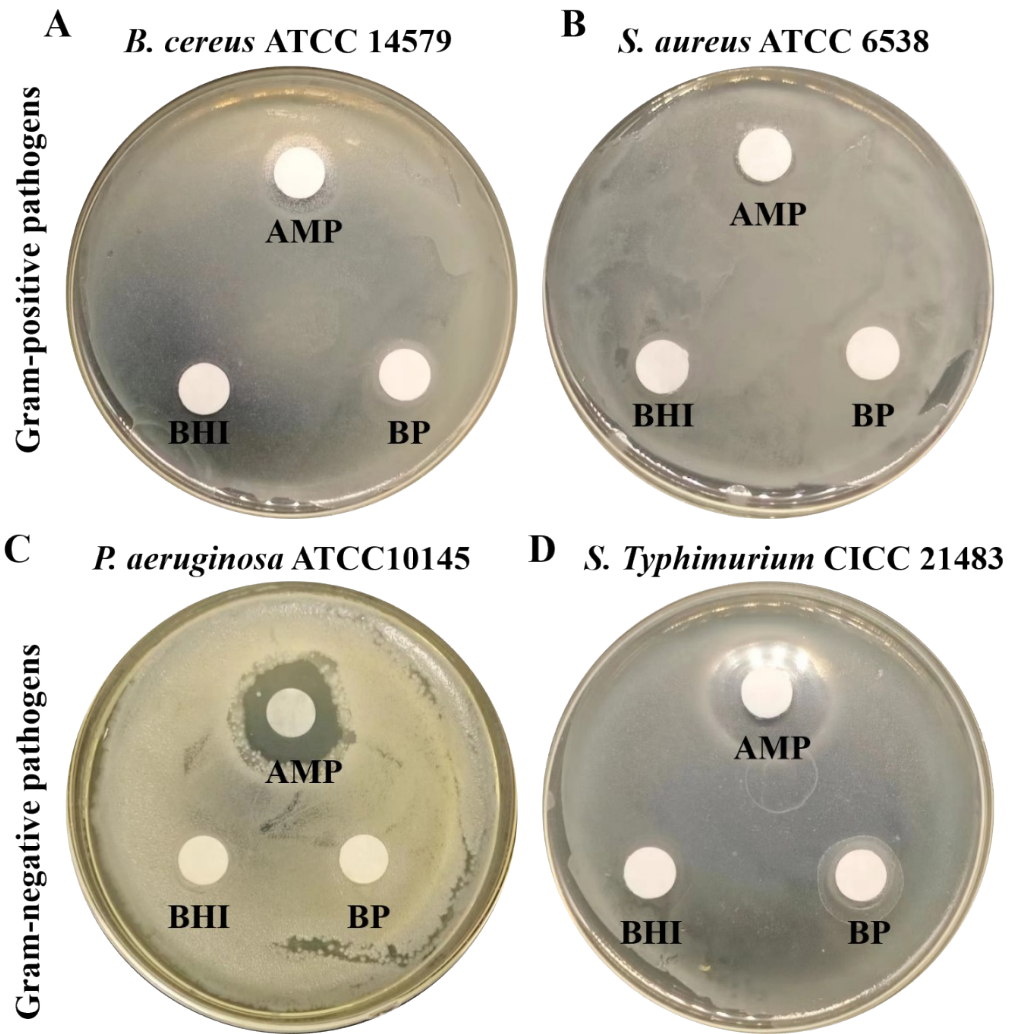

**Supplementary Fig. 4** Antimicrobial activity of *B. paralicheniformis* HMPM220325. (A) *B. cereus* ATCC 14579, (B) *S. aureus* ATCC 6538, (C) *P. aeruginosa* ATCC10145 and (D) *S. Typhimurium* CICC 21483. AMP, ampicillin; BHI, Brain Heart Infusion medium; BP, *B. paralicheniformis* HMPM220325's fermentation broth.

**Supplementary Table 1** Examples of probiotic supplements containing *Bacillus* spp. available in global market.

| Product                 | Strain (only <i>Bacillus</i> spp. are shown)                                                                                            | Country        |
|-------------------------|-----------------------------------------------------------------------------------------------------------------------------------------|----------------|
| Bactisubtil®            | <i>B. cereus</i> IP 5832                                                                                                                | France         |
| BioKult®                | <i>B. subtilis</i> PXN 21                                                                                                               | United Kingdom |
| Biosporin®              | <i>B. subtilis</i> 2335 and <i>B. licheniformis</i> 2336                                                                                | Russia         |
| Biovicerin®             | <i>B. cereus</i> GM                                                                                                                     | Brazil         |
| Sustenex®               | <i>B. coagulans</i> GBI-30                                                                                                              | United States  |
| Nutrition essentials    | <i>B. coagulans</i> 15B                                                                                                                 | United States  |
| Probiotic               |                                                                                                                                         |                |
| LifeinU™                | <i>B. subtilis</i> CU1                                                                                                                  | Europe         |
| Just Thrive             | <i>B. indicus</i> HU36™, <i>B. coagulans</i> SC-208, <i>B. clausii</i> SC-109, <i>B. subtilis</i> HU58™                                 | United States  |
| MegaSporeBiotic         | <i>B. indicus</i> HU36™, <i>B. subtilis</i> HU58™, <i>B. coagulans</i> SC-208, <i>B. licheniformis</i> SL-307, <i>B. clausii</i> SC-109 | United Kingdom |
| BioPlus 2B®             | <i>B. subtilis</i> CH201/DSM5749 and <i>B. licheniformis</i> CH200/DSM5749                                                              | Denmark        |
| GanedenBC <sup>30</sup> | <i>B. coagulans</i> GBI-30, 6086                                                                                                        | United States  |
| Bispan®                 | <i>B. polyfermenticus</i> SCD                                                                                                           | South Korea    |

**Supplementary Table 2** Assignment of proteins in the draft genome of *B. paralicheniformis* HMPM220325 to COG functional categories

| COG Functional categories                                         | No. of genes | % of total genes |
|-------------------------------------------------------------------|--------------|------------------|
| <b>Metabolism:</b>                                                |              |                  |
| Energy production and conversion (C)                              | 184          | 42.31            |
| Amino acid transport and metabolism (E)                           | 356          |                  |
| Nucleotide transport and metabolism (F)                           | 100          |                  |
| Carbohydrate transport and metabolism (G)                         | 365          |                  |
| Coenzyme transport and metabolism (H)                             | 203          |                  |
| Lipid transport and metabolism (I)                                | 160          |                  |
| Inorganic ion transport and metabolism (P)                        | 215          |                  |
| Secondary metabolites biosynthesis, transport and catabolism (Q)  | 84           |                  |
| <i>Total</i>                                                      | 1667         |                  |
| <b>Cellular Processes and Signalling:</b>                         |              |                  |
| Cell cycle control, cell division, chromosome partitioning (D)    | 227          | 27.41            |
| Cell wall/membrane/envelope biogenesis (M)                        | 214          |                  |
| Cell motility (N)                                                 | 47           |                  |
| Posttranslational modification, protein turnover, chaperones (O)  | 155          |                  |
| Signal transduction mechanisms (T)                                | 228          |                  |
| Intracellular trafficking, secretion, and vesicular transport (U) | 36           |                  |
| Defense mechanisms (V)                                            | 128          |                  |
| Extracellular structures (W)                                      | 5            |                  |
| Cytoskeleton (Z)                                                  | 6            |                  |
| Mobilome: prophages, transposons (X)                              | 34           |                  |
| <i>Total</i>                                                      | 1080         |                  |
| <b>Information Storage and Processing:</b>                        |              |                  |
| Translation, ribosomal structure and biogenesis (J)               | 246          | 18.60            |
| Transcription (K)                                                 | 370          |                  |
| Replication, recombination and repair (L)                         | 117          |                  |
| <i>Total</i>                                                      | 733          |                  |
| <b>Poorly Characterized:</b>                                      |              |                  |
| General function prediction only (R)                              | 292          | 11.68            |
| Function unknown (S)                                              | 168          |                  |
| <i>Total</i>                                                      | 460          |                  |
| <b>Total number of genes</b>                                      | <b>3940</b>  |                  |

**Supplementary Table 5** Putative virulence genes detected using Virulence Factor Database (VFDB) with role in classic physiological functions

| Virulence gene | Protein                                        | Description                                                                                                                                                                       | COG category |
|----------------|------------------------------------------------|-----------------------------------------------------------------------------------------------------------------------------------------------------------------------------------|--------------|
| <i>ClpC</i>    | Endopeptidase Clp ATP-binding chain C          | An ATPase promoting early escape from the phagosome of macrophages; ClpC is also required for adhesion and invasion, possibly by modulating the expression of InlA, InlB and ActA | O            |
| <i>EF-Tu</i>   | Elongation factor Tu                           | Surface-expressed elongation factor-Tu (EF-Tu) mediates attachment by interacting with host cell nucleolin                                                                        | J            |
| <i>Capsule</i> | NADP-dependent phosphogluconate dehydrogenase  | Assisting in evading the host immune system by protecting bacteria from opsonophagocytosis and serum killing                                                                      | G            |
| <i>ClpP</i>    | ATP-dependent Clp protease proteolytic subunit | Serine protease involved in proteolysis and is required for growth under stress conditions                                                                                        | O            |

**Supplementary Table 6** Putative genes in *B. paralicheniformis* HMPM220325 involved in spore formation and germination

| Function                                                     | Genes                                       | Gene Len (bp)                    | Gene ID  |          |
|--------------------------------------------------------------|---------------------------------------------|----------------------------------|----------|----------|
| Spore germination                                            | Ger(x)C family spore germination protein    | 1224                             | gene0470 |          |
|                                                              |                                             | 1197                             | gene2264 |          |
|                                                              | Spore germination protein KA                | 1674                             | gene0469 |          |
|                                                              |                                             | 1437                             | gene1241 |          |
|                                                              | Spore germination protein GerT              | 453                              | gene2365 |          |
|                                                              | Spore germination protein YndE              | 1101                             | gene2265 |          |
|                                                              | Spore germination protein YndD              | 1569                             | gene2267 |          |
|                                                              | Spore germination protein AA                | 1443                             | gene3596 |          |
|                                                              | Spore germination lipase LipC               | 639                              | gene0519 |          |
| Germination-specific N-acetylmuramoyl-L-alanine amidase CwID | 714                                         | gene0184                         |          |          |
| Spore formation                                              | Sporulation initiation phosphotransferase B | 579                              | gene3048 |          |
|                                                              | Sporulation initiation phosphotransferase F | 375                              | gene4024 |          |
| Pre-septation                                                | Stage 0 sporulation protein YaaT            | 828                              | gene0046 |          |
| Post-septation                                               | Stage II sporulation protein E              | 2490                             | gene0080 |          |
|                                                              |                                             | 768                              | gene2586 |          |
|                                                              | Stage II sporulation protein M              | 657                              | gene2595 |          |
|                                                              |                                             | 555                              | gene2771 |          |
|                                                              | Stage II sporulation protein P              | 1206                             | gene2843 |          |
|                                                              | Stage II sporulation protein D              | 981                              | gene3984 |          |
|                                                              | Stage II sporulation protein R              | 660                              | gene4005 |          |
|                                                              | Post-engulfment                             | Stage III sporulation protein AE | 1206     | gene2710 |
|                                                              |                                             | Stage III sporulation protein AD | 366      | gene2711 |
|                                                              |                                             | Stage III sporulation protein AC | 207      | gene2712 |
|                                                              |                                             | Stage III sporulation protein AB | 516      | gene2713 |
| Stage III sporulation protein AA                             |                                             | 924                              | gene2714 |          |
| Stage IV sporulation protein A                               |                                             | 1479                             | gene2515 |          |
| Stage IV sporulation protein B                               |                                             | 1284                             | gene2694 |          |
| Stage V sporulation protein T                                |                                             | 537                              | gene0070 |          |
| Stage V sporulation protein R                                |                                             | 1410                             | gene1056 |          |
| Stage V sporulation protein D                                |                                             | 1935                             | gene1771 |          |
| Stage V sporulation protein E                                | Stage V sporulation protein E               | 1026                             | gene1775 |          |
|                                                              |                                             | 261                              | gene1953 |          |
|                                                              | Stage V sporulation protein SpoVS           | 261                              | gene1953 |          |
|                                                              | Stage V sporulation protein K               | 966                              | gene2059 |          |
|                                                              | Stage V sporulation protein AE              | 603                              | gene2580 |          |
|                                                              | 351                                         | gene2581                         |          |          |
|                                                              | Stage V sporulation protein AD              | 1020                             | gene2582 |          |
|                                                              | Stage V sporulation protein AC              | 450                              | gene2583 |          |
|                                                              | Stage V sporulation protein AF              | 1473                             | gene2579 |          |



---

|                                                                      |                                                                                                                                            |          |          |
|----------------------------------------------------------------------|--------------------------------------------------------------------------------------------------------------------------------------------|----------|----------|
|                                                                      |                                                                                                                                            | 1455     | gene2760 |
|                                                                      | Stage V sporulation protein AB                                                                                                             | 426      | gene2584 |
|                                                                      | Stage V sporulation protein AA                                                                                                             | 621      | gene2585 |
|                                                                      | Stage V sporulation protein B                                                                                                              | 1554     | gene3017 |
|                                                                      | Stage VI sporulation protein F                                                                                                             | 258      | gene1339 |
| Spore coat formation<br>and sporulation<br>regulation                | KinB signaling pathway activation protein                                                                                                  | 600      | gene0187 |
|                                                                      | Stage 0 sporulation protein YaaT, Cell fate<br>regulator YaaT, PSP1 superfamily (controls<br>sporulation, competence, biofilm development) | 828      | gene0046 |
|                                                                      | Spore germination protein GerPA/GerPF (inner<br>spore coat)                                                                                | 219      | gene1216 |
|                                                                      |                                                                                                                                            | 222      | gene1221 |
|                                                                      |                                                                                                                                            | 207      | gene1258 |
|                                                                      |                                                                                                                                            | 222      | gene3468 |
|                                                                      | Spore germination protein GerPB, DUF2539<br>family (inner spore coat)                                                                      | 246      | gene1220 |
|                                                                      | Spore germination protein GerPC (inner spore<br>coat)                                                                                      | 615      | gene1219 |
|                                                                      | Spore germination protein GerPD (inner spore<br>coat)                                                                                      | 183      | gene1218 |
|                                                                      | Spore germination protein GerPE (inner spore<br>coat)                                                                                      | 384      | gene1217 |
|                                                                      | RNA polymerase sporulation specific sigma<br>factor SigK                                                                                   | 726      | gene2870 |
|                                                                      |                                                                                                                                            | 270      | gene2881 |
|                                                                      | Sporulation inhibitor of replication protein SirA                                                                                          | 438      | gene2113 |
|                                                                      | RNA polymerase sporulation specific sigma<br>factor SigF                                                                                   | 768      | gene2586 |
|                                                                      | Spore maturation protein A                                                                                                                 | 588      | gene2558 |
|                                                                      | Spore maturation protein B                                                                                                                 | 537      | gene2557 |
|                                                                      | Spore cortex-lytic enzyme CwlJ                                                                                                             | 429      | gene0365 |
|                                                                      | Spore cortex-lytic enzyme SleB                                                                                                             | 966      | gene2528 |
|                                                                      | Spore germination protein YpeB                                                                                                             | 1353     | gene2527 |
| Sporulation-specific extracellular nuclease NucB                     | 429                                                                                                                                        | gene2107 |          |
| 3'-5' exonuclease KapD, inhibitor of KinA-<br>controlled sporulation | 618                                                                                                                                        | gene3437 |          |
| Spore coat protein rfbE                                              | 1092                                                                                                                                       | gene0850 |          |
| Spore coat protein CotF                                              | 648                                                                                                                                        | gene1027 |          |
| Spore coat associated protein CotJA                                  | 234                                                                                                                                        | gene1200 |          |
| Spore coat protein CotJB                                             | 264                                                                                                                                        | gene1201 |          |
| Spore coat protein CotO                                              | 480                                                                                                                                        | gene1330 |          |
| Spore coat protein CotZ                                              | 450                                                                                                                                        | gene1331 |          |

---

---

|                                                  |      |          |
|--------------------------------------------------|------|----------|
| Spore coat protein CotY                          | 483  | gene1332 |
| Spore coat protein CotV/CotX                     | 513  | gene1333 |
| Spore coat protein W                             | 405  | gene1334 |
| Spore coat protein CotV                          | 387  | gene1335 |
| Spore coat protein YsxE                          | 1023 | gene3068 |
| Spore coat protein GerQ                          | 537  | gene4062 |
| Endospore coat-associated protein YutH           | 1005 | gene3519 |
| Endospore coat-associated protein YheD           | 1083 | gene1112 |
| Inner spore coat protein H                       | 1086 | gene1224 |
| Sporulation protein cse60                        | 183  | gene3263 |
| Gamma-type small acid-soluble spore protein      | 165  | gene0938 |
| Alpha/beta-type small acid-soluble spore protein | 204  | gene1106 |
|                                                  | 198  | gene1584 |
|                                                  | 213  | gene3209 |
| Small acid-soluble spore protein Tlp             | 237  | gene2125 |
| Small acid-soluble spore protein H               | 180  | gene3032 |
| Small acid-soluble spore protein SspI            | 216  | gene3127 |
| Sporulation membrane protein YtaF                | 633  | gene3167 |
| Spore transcriptional regulator GerE             | 225  | gene3101 |

---

**Supplementary Table 7** Antineoplastic genes identified and their location in the *B. paralicheniformis* HMPM220325 genome

| Resistance                  | Gene ID  | KO ID  | KO Name                | KO Description                                                                                             |
|-----------------------------|----------|--------|------------------------|------------------------------------------------------------------------------------------------------------|
| Antifolate<br>resistance    | gene0737 | K00602 | purH                   | phosphoribosylaminoimidazolecarboxamide<br>formyltransferase / IMP cyclohydrolase [EC:2.1.2.3<br>3.5.4.10] |
|                             | gene1254 | K00297 | metF,<br>MTHFR         | methylenetetrahydrofolate reductase (NADPH)<br>[EC:1.5.1.20]                                               |
|                             | gene2106 | K00560 | thyA,<br>TYMS          | thymidylate synthase [EC:2.1.1.45]                                                                         |
|                             | gene2414 | K00287 | DHFR,<br>folA          | dihydrofolate reductase [EC:1.5.1.3]                                                                       |
|                             | gene3998 | K00600 | glyA,<br>SHMT          | glycine hydroxymethyltransferase [EC:2.1.2.1]                                                              |
| Platinum drug<br>resistance | gene3665 | K17686 | copA,<br>ctpA,<br>ATP7 | P-type Cu <sup>+</sup> transporter [EC:7.2.2.8]                                                            |
